# Supplementary material for: Undocumented Older Latino Immigrants in the United States: Population Projections and Share of Older Undocumented Latinos by Health Insurance Coverage and Chronic Health Conditions, 2018–2038
Source: Oxford University Press journal article supplement (doi:10.1093/geronb/gbab189), 2021-10-12
Supplement: gbab189_suppl_supplementary_figure_s1_and_tables_s1-s2.pdf [file gbab189_suppl_supplementary_figure_s1_and_tables_s1-s2.pdf]

Supplemental Table 1. Projected number of Latino undocumented immigrants by age under the status quo scenario, 2018-2038 (1,000s)

|      | 0-39  | 40-54 | 55-64 | 65-74 | 75+   | Total |
|------|-------|-------|-------|-------|-------|-------|
| 2018 | 4,934 | 3,148 | 330   | 100   | 61    | 8,573 |
| 2019 | 4,771 | 3,238 | 390   | 116   | 49    | 8,563 |
| 2020 | 4,604 | 3,267 | 488   | 144   | 61    | 8,564 |
| 2021 | 4,445 | 3,299 | 572   | 175   | 73    | 8,564 |
| 2022 | 4,295 | 3,332 | 642   | 210   | 87    | 8,565 |
| 2023 | 4,155 | 3,365 | 698   | 247   | 102   | 8,568 |
| 2024 | 4,026 | 3,393 | 750   | 285   | 118   | 8,571 |
| 2025 | 3,942 | 3,336 | 823   | 329   | 147   | 8,577 |
| 2026 | 3,860 | 3,281 | 896   | 373   | 179   | 8,589 |
| 2027 | 3,783 | 3,228 | 970   | 413   | 213   | 8,608 |
| 2028 | 3,712 | 3,178 | 1,045 | 453   | 250   | 8,638 |
| 2029 | 3,646 | 3,128 | 1,087 | 527   | 290   | 8,678 |
| 2030 | 3,631 | 3,002 | 1,111 | 627   | 358   | 8,729 |
| 2031 | 3,618 | 2,888 | 1,136 | 723   | 432   | 8,797 |
| 2032 | 3,604 | 2,785 | 1,164 | 813   | 512   | 8,879 |
| 2033 | 3,589 | 2,693 | 1,195 | 898   | 599   | 8,974 |
| 2034 | 3,577 | 2,608 | 1,225 | 989   | 684   | 9,082 |
| 2035 | 3,591 | 2,498 | 1,224 | 1,088 | 802   | 9,203 |
| 2036 | 3,604 | 2,399 | 1,225 | 1,196 | 919   | 9,343 |
| 2037 | 3,614 | 2,311 | 1,228 | 1,314 | 1,032 | 9,499 |
| 2038 | 3,623 | 2,232 | 1,233 | 1,441 | 1,143 | 9,672 |

---

Notes: Residual estimate for 2018; projections for 2019-2038. The status quo scenario assumes that rates of mortality, other departures from the undocumented population, and new immigration persist at their current levels, and does not account for economic or policy changes that could potentially impact the size of the undocumented population.

Supplemental Figure 1. Projected number of Latino undocumented immigrants by detailed age under the status quo scenario, 2018 and 2038

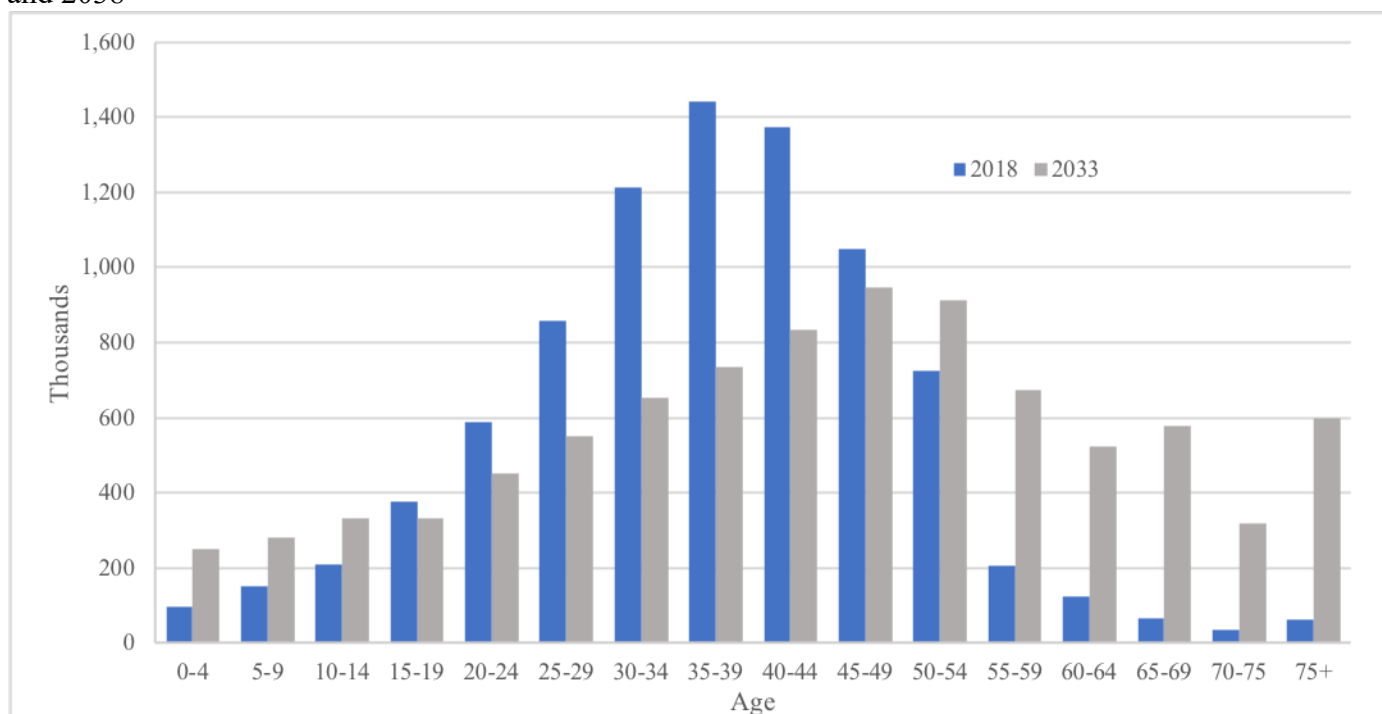

Supplemental Table 2. Projected number of Latino undocumented immigrants age 55+ and percentage that aged in place under the status quo scenario, 2018-2038

|      | Number Age 55+ (1,000s) | % Aged in Place<br>(Arrived Before Age 55) |
|------|-------------------------|--------------------------------------------|
| 2018 | 491                     | 86.6                                       |
| 2019 | 555                     | 90.8                                       |
| 2020 | 693                     | 91.9                                       |
| 2021 | 820                     | 92.4                                       |
| 2022 | 939                     | 92.8                                       |
| 2023 | 1,047                   | 92.8                                       |
| 2024 | 1,153                   | 92.9                                       |
| 2025 | 1,299                   | 93.1                                       |
| 2026 | 1,448                   | 93.2                                       |
| 2027 | 1,596                   | 93.4                                       |
| 2028 | 1,748                   | 93.5                                       |
| 2029 | 1,904                   | 93.6                                       |
| 2030 | 2,096                   | 93.8                                       |
| 2031 | 2,291                   | 93.9                                       |
| 2032 | 2,489                   | 94.0                                       |
| 2033 | 2,692                   | 94.1                                       |
| 2034 | 2,898                   | 94.1                                       |
| 2035 | 3,114                   | 94.2                                       |
| 2036 | 3,340                   | 94.3                                       |
| 2037 | 3,574                   | 94.4                                       |
| 2038 | 3,817                   | 94.5                                       |

Notes: Residual estimate for 2018; projections for 2019-2038. The status quo scenario assumes that rates of mortality, other departures from the undocumented population, and new immigration persist at their current levels, and does not account for economic or policy changes that could potentially impact the size of the undocumented population.
